# Supplementary material for: Characterization of silk sponge in the wet state using13C solid state NMR for development of a porous silk vascular graft with small diameter
Source: Royal Society of Chemistry journal article supplement (doi:10.1039/c3ra45190a), 2013-12-23
Supplement: c3ra45190a.pdf [file c3ra45190a.pdf]

Wet

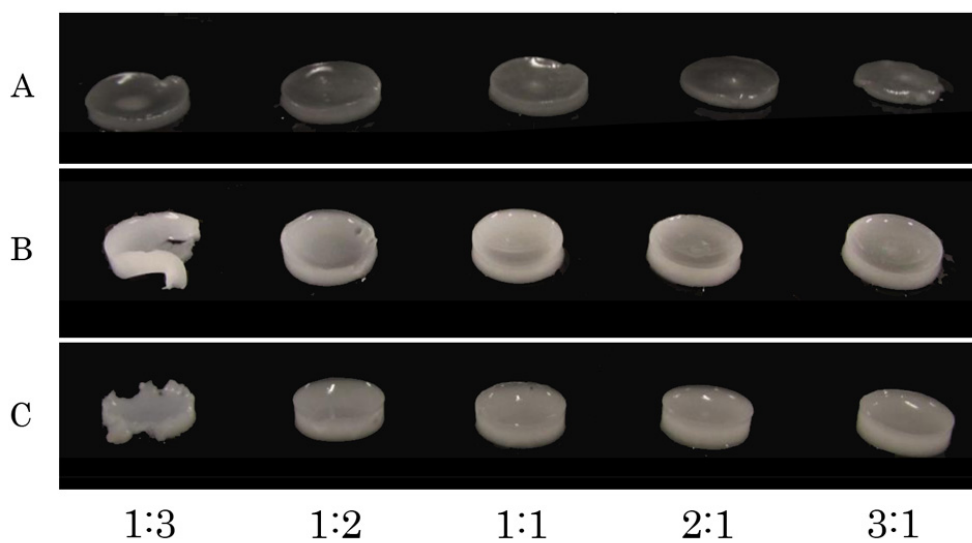

Dry

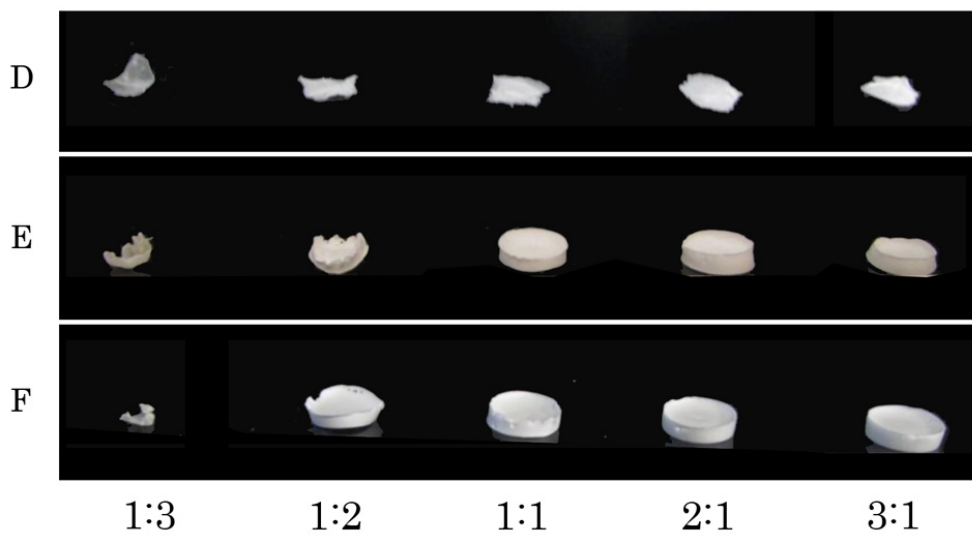

**Supplemental Figure 1.** Macroscopic of silk fibroin porous scaffold formed with some silk concentrations, 1% (A.D), 5% (B.E), and 9% (C.F). A, B and C show wet condition. D, E, and F are dried. The under numbers show the weight ratio; SF: PGDE.
